# Supplementary material for: A Huntingtin Peptide Inhibits PolyQ-Huntingtin Associated Defects
Source: PubMed Central journal article supplement (PMC3701666; doi:10.1371/journal.pone.0068775), 2013-07-04
Supplement: pone.0068775.s002.pdf [file pone.0068775.s002.pdf]

A- polyQ-hHtt

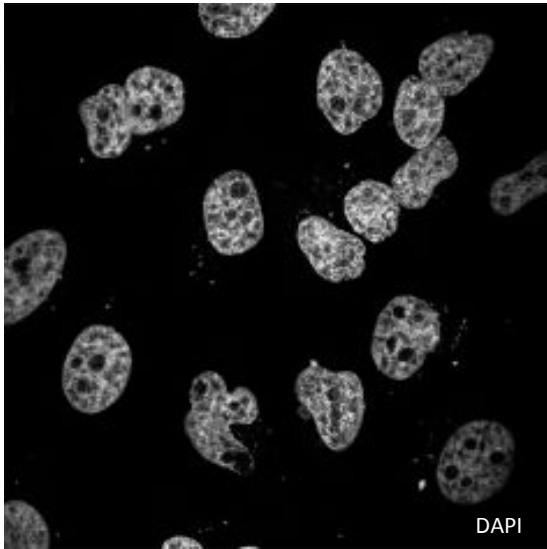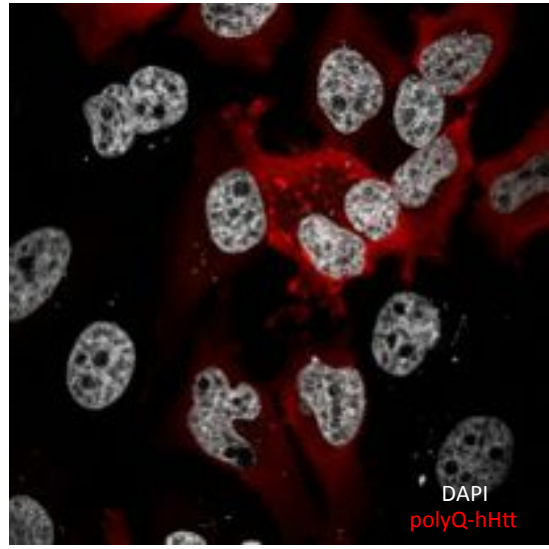

B- polyQ-hHtt + P42<sup>23aa</sup>

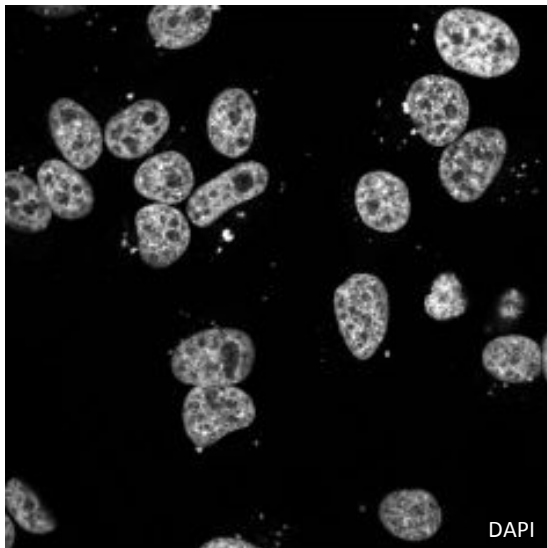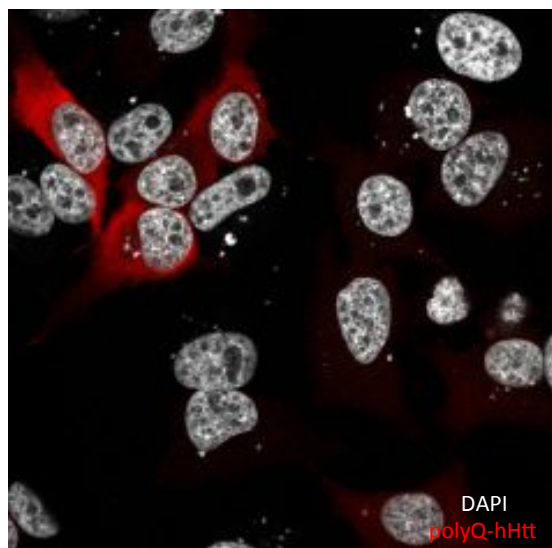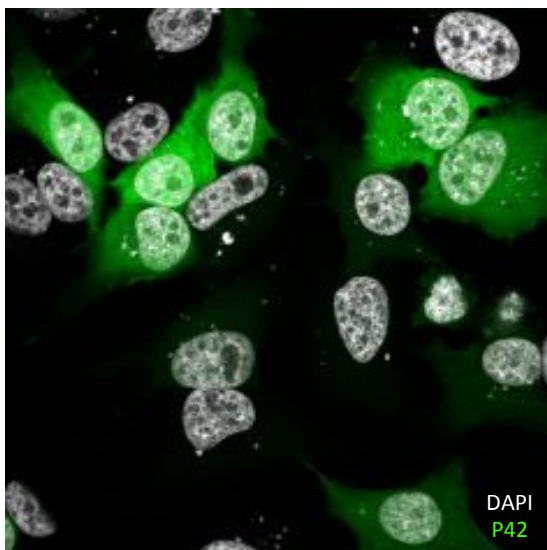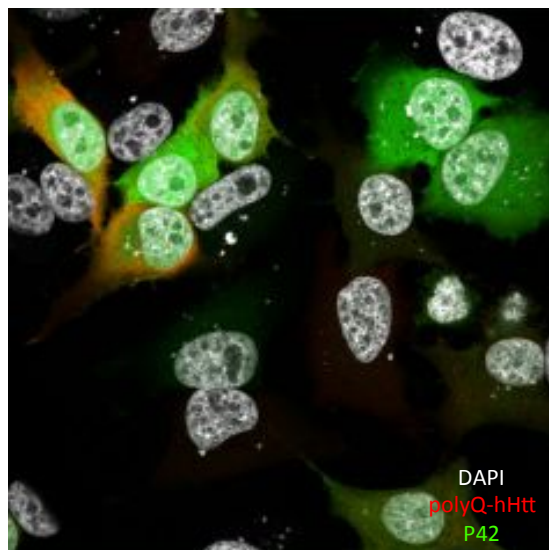

**Figure S2:** Low magnification images of HeLa cells transfected with polyQ-hHtt (in red). A- in absence of P42. B- in presence of P42 (in green). DAPI staining is shown in grey.
