# Supplementary material for: A Huntingtin Peptide Inhibits PolyQ-Huntingtin Associated Defects
Source: PubMed Central journal article supplement (PMC3701666; doi:10.1371/journal.pone.0068775), 2013-07-04
Supplement: pone.0068775.s003.pdf [file pone.0068775.s003.pdf]

|             |     |                                |                      |     |
|-------------|-----|--------------------------------|----------------------|-----|
|             |     | Pep42                          |                      |     |
|             |     | motif A                        | motif B              |     |
| <b>hHTT</b> | 482 | <b>AASSGVSTPGSAGHDIITEQPRS</b> |                      | 504 |
|             |     |                                | <b>+AG D TE P S</b>  |     |
| <b>dHTT</b> | 433 | -----                          | <b>NAGEDAPTEAPSS</b> | 455 |
|             | 546 | <b>AASSG</b>                   |                      | 550 |

**Figure S3:** Alignment between dHtt (1-620aa) and hHtt P4 (166aa) (aa 382-548 region of hHtt). Using BLASTp NCBI, we identified a 13aa peptide showing 54% identities (motif B). The AASSG motif (motif A) was identified in both dHtt and hHtt. In the human counterpart, A and B motifs of homologies are contained in a short 23aa peptide, referred as to P42. Because A motif could be of importance, P42, containing both motifs, was designed and analysed for its protective properties.
