# Supplementary material for: A Huntingtin Peptide Inhibits PolyQ-Huntingtin Associated Defects
Source: PubMed Central journal article supplement (PMC3701666; doi:10.1371/journal.pone.0068775), 2013-07-04
Supplement: pone.0068775.s004.pdf [file pone.0068775.s004.pdf]

A- Quantification of aggregates in HeLa cells

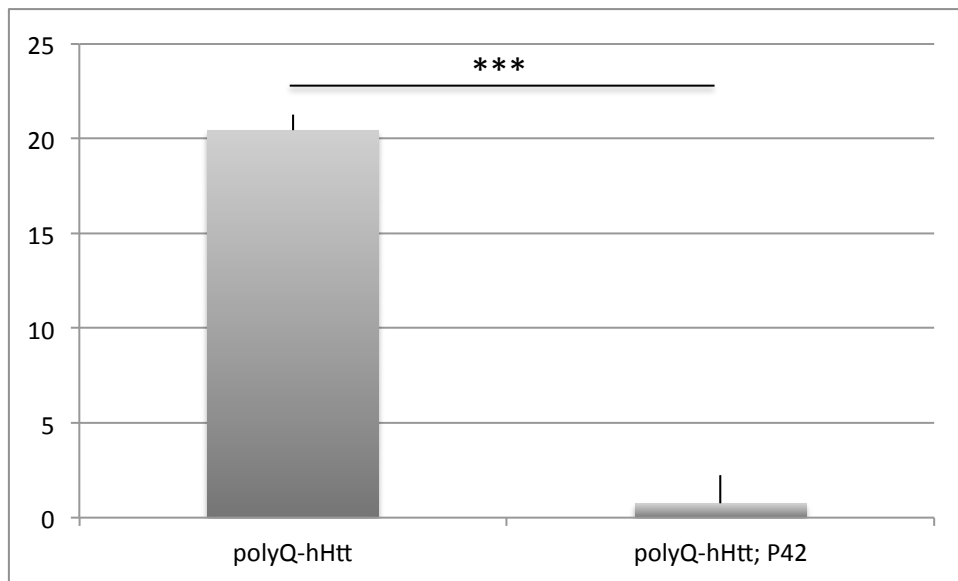

*n=10-16 cells*

B- Aggregate number on  $10^4 \mu\text{m}^2$  in salivary glands

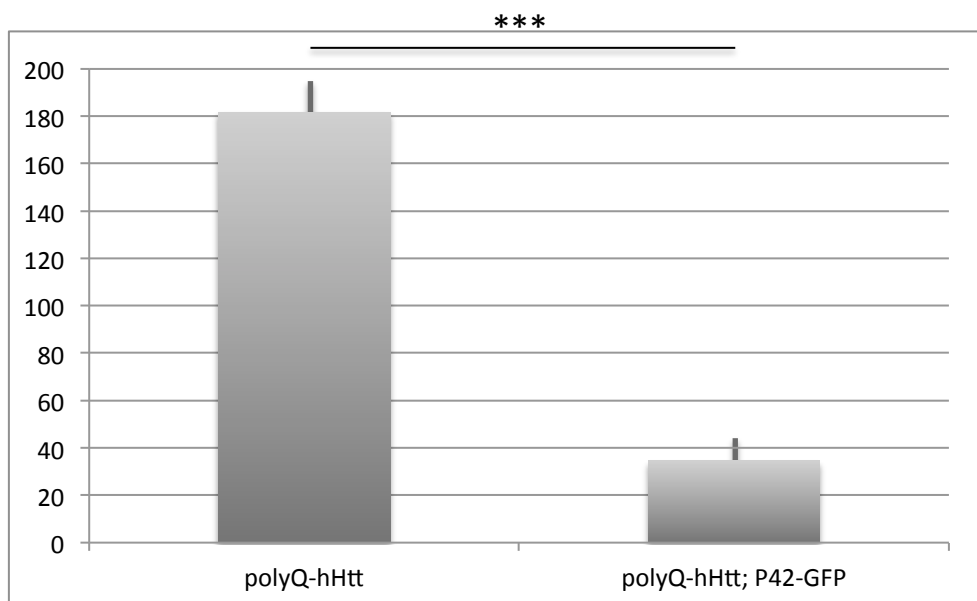

*n=4-6 slices in 4 larvae*

**Figure S4:** Quantification of aggregates, using ImageJ software on confocal stacks. All images were threshold at the same intensity (120). We used the « analyze particles » function with a minimum size of 10 pixels to obtain a total number of particles (aggregates). Aggregates in absence (polyQ-hHtt) or in presence of P42 (polyQ-hHtt; P42) have been quantified in HeLa cells (A) and in larval salivary glands (B). Data were analysed by using the *Student's t-test*: \*\*\* $p < 0.001$ .
