# Supplementary material for: A Huntingtin Peptide Inhibits PolyQ-Huntingtin Associated Defects
Source: PubMed Central journal article supplement (PMC3701666; doi:10.1371/journal.pone.0068775), 2013-07-04
Supplement: pone.0068775.s005.pdf [file pone.0068775.s005.pdf]

A- Transfection of HeLa cells with GFP-hHtt<sup>171aa</sup>-Q138

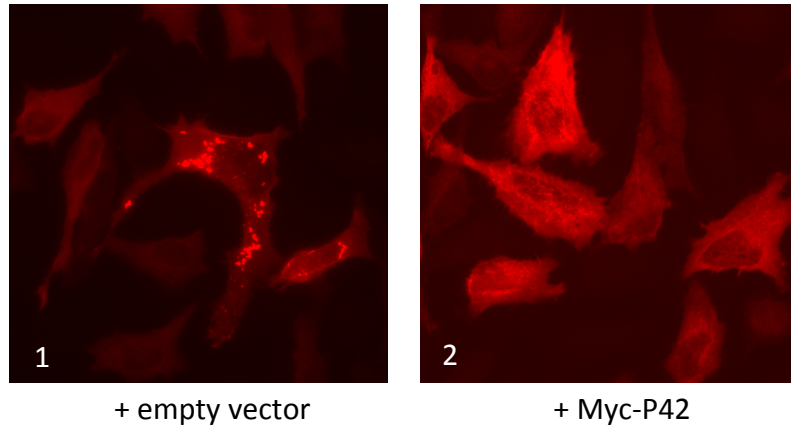

B- Transfection of HeLa cells with GFP-hHtt<sup>171aa</sup>-Q138 and Myc-P41

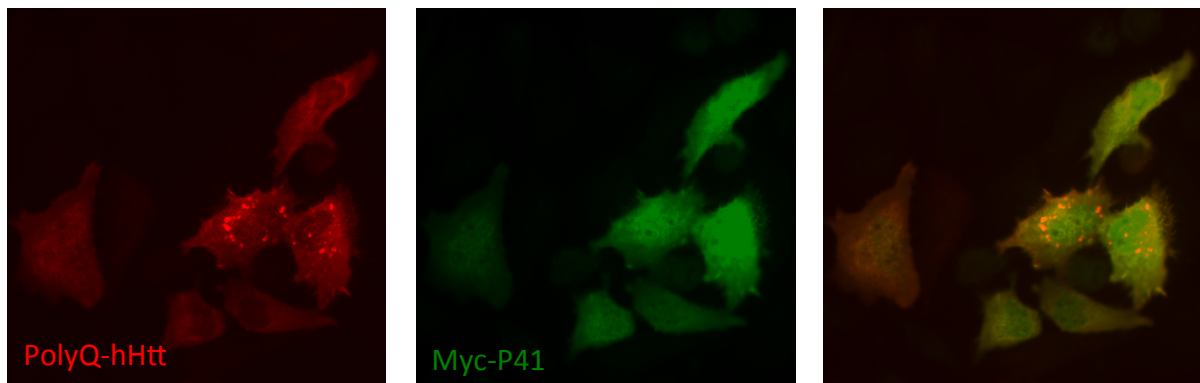

**Figure S5:** PolyQ-hHtt expression in HeLa cells (in red). (A1) in presence of BS empty vector. (A2) In presence of the P42 peptide Myc-tagged at its 5' end: polyQ-hHtt do not form aggregates anymore. (B) In a same set of experiments, in presence of P41 peptide Myc-tagged at its 5' end (in green), polyQ-hHtt (in red) still form aggregates.
