# Supplementary material for: A Huntingtin Peptide Inhibits PolyQ-Huntingtin Associated Defects
Source: PubMed Central journal article supplement (PMC3701666; doi:10.1371/journal.pone.0068775), 2013-07-04
Supplement: pone.0068775.s007.pdf [file pone.0068775.s007.pdf]

### A- hHtt

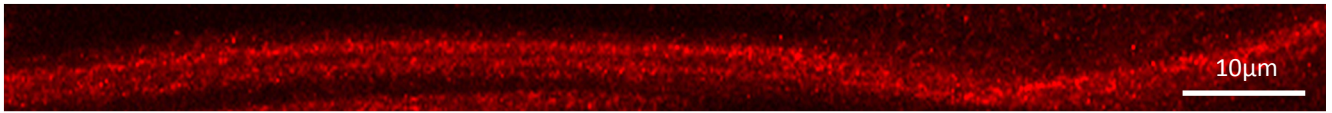

### B- polyQ-hHtt; LacZ

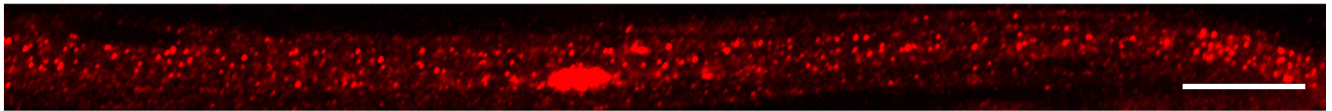

### C- polyQ-hHtt; P42

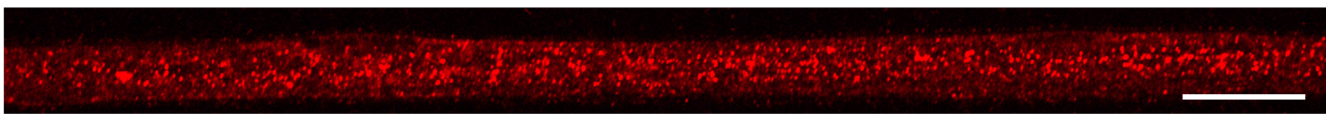

### D- Quantification

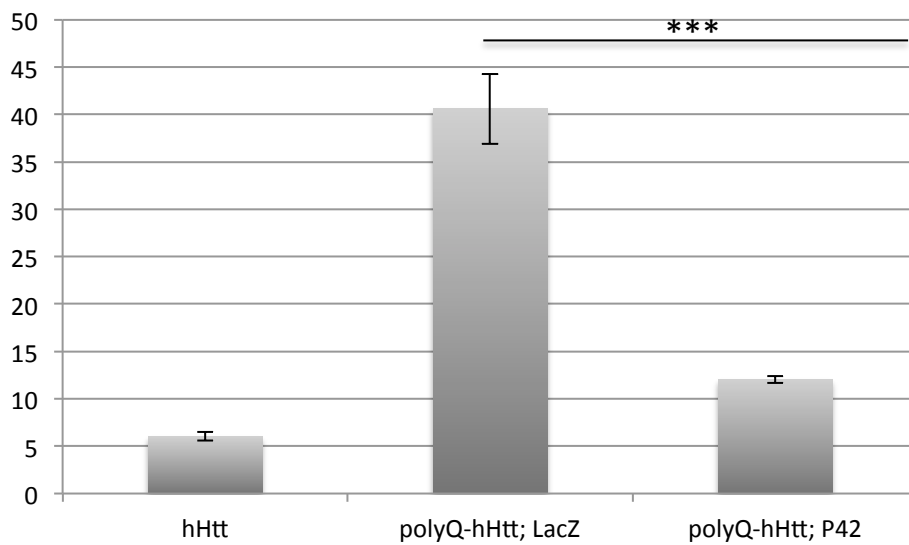

**Figure S7:** Confocal images of third larval peripheral nerves expressing hHtt<sup>548aa</sup>, detected by anti-hHtt (Hu-4C8) (in red) expressing in A- OK6-Gal4; UAS-0Q-hHtt<sup>548aa</sup> (hHtt). B- OK6-Gal4; UAS-128Q-hHtt<sup>548aa</sup>; UAS-LacZ. C- OK6-Gal4; UAS-128Q-hHtt<sup>548aa</sup>; UAS-P42. D- Quantification of particle density for 100µm axon segments ( $n=10$ ), using ImageJ particle quantification Plugin. Data were analysed by using the *Student's t-test*: \*\*\* $p<0.001$ .
