# Supplementary material for: A Huntingtin Peptide Inhibits PolyQ-Huntingtin Associated Defects
Source: PubMed Central journal article supplement (PMC3701666; doi:10.1371/journal.pone.0068775), 2013-07-04
Supplement: pone.0068775.s008.pdf [file pone.0068775.s008.pdf]

Ok6 Gal4/ UAS-NPY-GFP

1- polyQ-hHtt; LacZ

2- polyQ-hHtt; P42

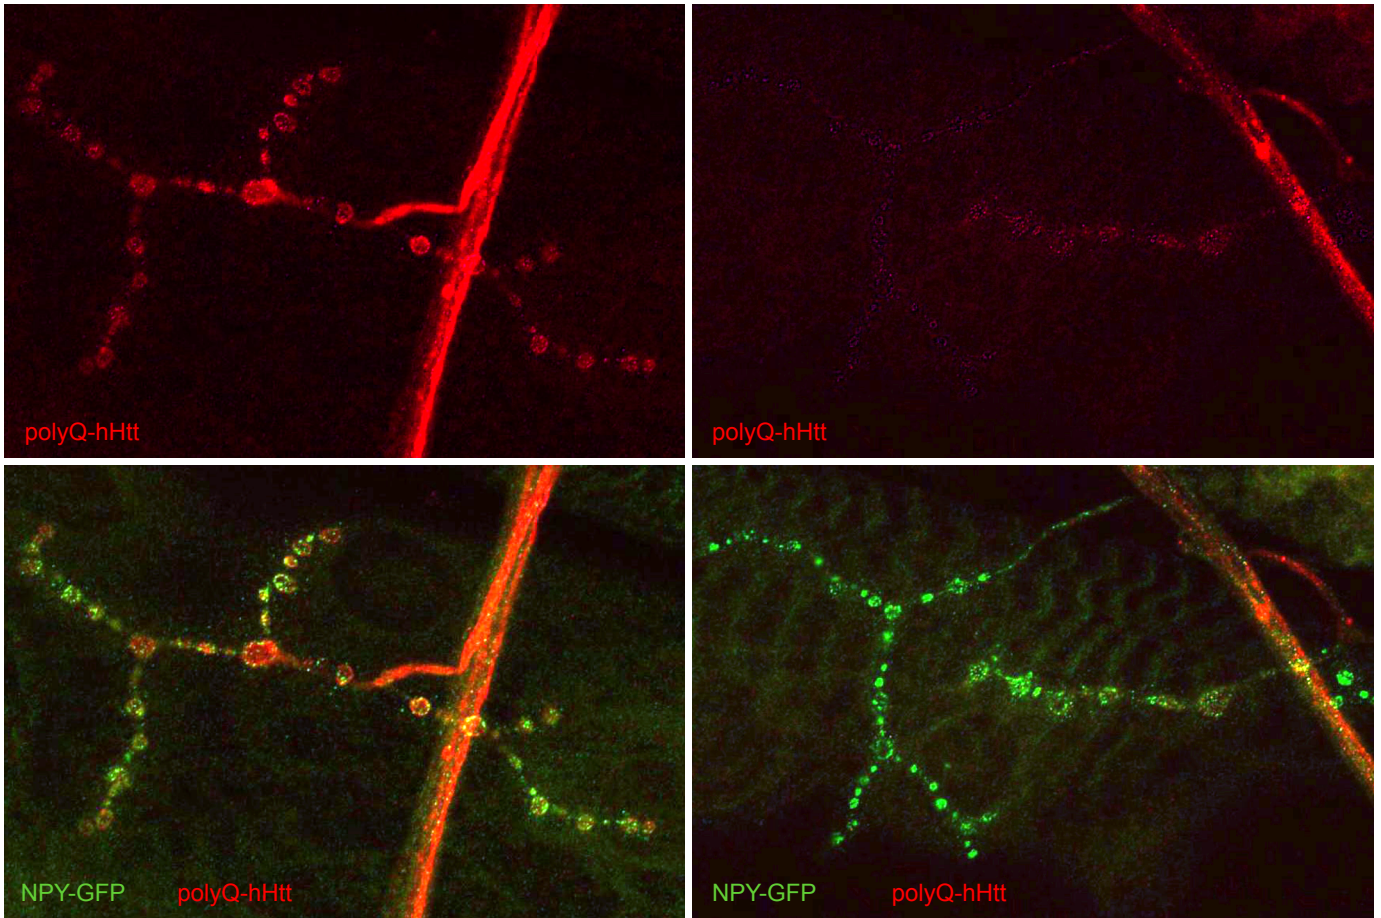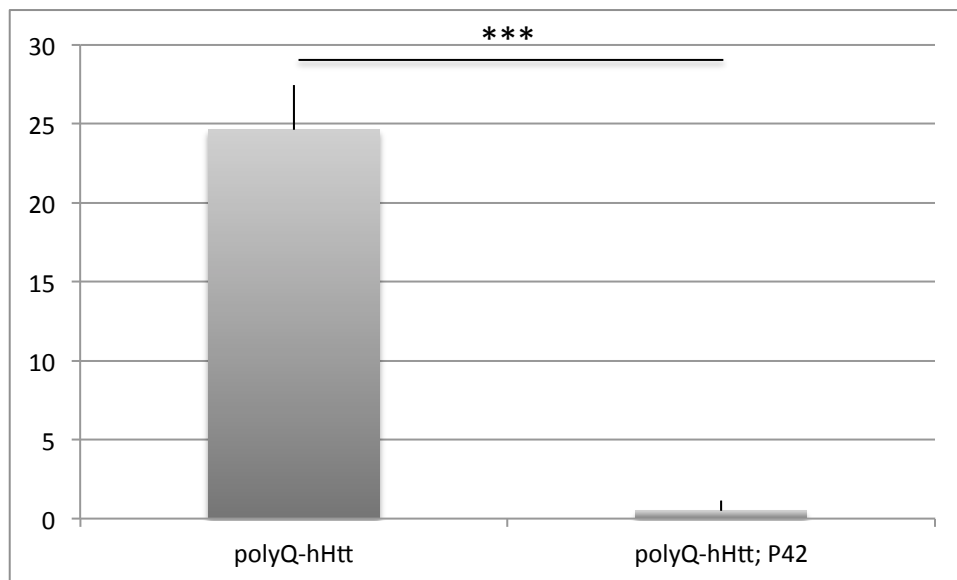

*n=4-6 slices in 3 NMJ*

**Figure S8:** Quantification of HHtt immunoreactivity (in red) at the NMJ, in absence (polyQ-hHtt) or in presence of P42 (polyQ-hHtt; P42). Data were analyzed by using the *Student's t-test*: \*\*\* $p < 0.001$ .
