# Supplementary material for: A Huntingtin Peptide Inhibits PolyQ-Huntingtin Associated Defects
Source: PubMed Central journal article supplement (PMC3701666; doi:10.1371/journal.pone.0068775), 2013-07-04
Supplement: pone.0068775.s009.pdf [file pone.0068775.s009.pdf]

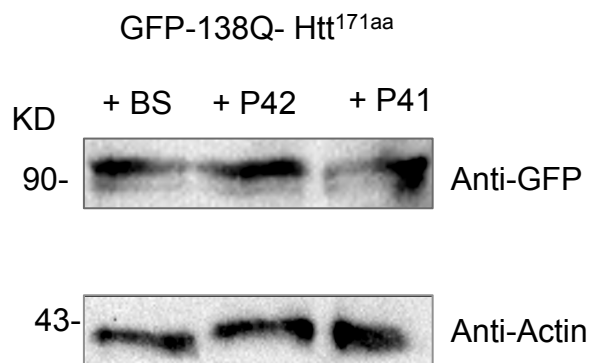

|                        | +BS  | +P42 | +P41 |
|------------------------|------|------|------|
| <b>GFP</b>             | 100% | 109% | 113% |
| <b>Actin</b>           | 100% | 118% | 136% |
| <b>Ratio GFP/Actin</b> | 1    | 0.92 | 0.83 |

**Figure S9:** Protein extracts from HeLa cells transfected by GFP-polyQ-hHtt in presence of empty vector (BS) or Cherry-P42 (P42) or Myc-P41 (P41) were analyzed on western blot. Note that when compared to Actin level of expression, the amount of expression of soluble polyQ-hHtt kept unchanged, ruling out that P42 is acting on Htt level of expression, which is confirmed in flies (Figure S6).

Quantifications have been performed on 2 independent experiments, which is summarized in the table: GFP and Actin were quantified relative to the control (+BS).
